# Supplementary material for: Termination of Ca2+ Release for Clustered IP3R Channels
Source: PLOS journal article supplement (doi:10.1371/journal.pcbi.1002485), 2012-05-31
Supplement: S1 (10.1371/journal.pcbi.1002485.s001) [file journal.pcbi.1002485.s001]

301 Moved Permanently

# Moved Permanently

The document has moved here.

---

Apache Server at www.ploscompbiol.org Port 80
